# Supplementary material for: Structural basis for the phase separation of the chromosome passenger complex
Source: eLife journal article supplement (doi:10.7554/elife.92709), 2024-03-08
Supplement: fig2-data1 [file Figure 2C Workbook.xlsx]

## Sheet: Sheet1
Fig 2C-Source Data
	Time (sec)	Free Protein			Droplet Protein
	10	0.439024	0.414634	0.426829	0.219512	0.219512	0.182927
	100	2.58537	2.63415	2.5	1.59756	1.54878	1.51219
	300	3.78049	3.80488	3.67073	3.07317	2.9878	2.92683
	1000	4.2439	4.36585	4.20732	4.23171	4.12195	3.97561
	3000	4.65854	4.81707	4.68293	4.68293	4.53658	4.39024
