# Supplementary material for: Structural basis for the phase separation of the chromosome passenger complex
Source: eLife journal article supplement (doi:10.7554/elife.92709), 2024-03-08
Supplement: fig2-data1 [file Figure 2D Workbook.xlsx]

## Sheet: Sheet1
Fig 2D-Source Data
	Time (sec)	Free Protein			Droplet Protein
	10	3.28049	3.28049	3.20732	3.35366	3.36585	3.32927
	100	3.82927	3.91463	3.84146	3.82927	3.85366	3.82927
	300	4.73171	4.69512	4.73171	4.80488	4.73171	4.76829
	1000	6.06098	6.07317	6.0122	6.23171	6.14634	6.12195
	3000	7	7.07317	7.02439	7.21951	7.06098	7.07317
