# Supplementary material for: Structural basis for the phase separation of the chromosome passenger complex
Source: eLife journal article supplement (doi:10.7554/elife.92709), 2024-03-08
Supplement: fig2-data1 [file Figure 2G Workbook.xlsx]

## Sheet: Sheet1
Fig 2G-Source Data
	Time (sec)	Free Protein			Droplet Protein
	10	0.829268	0.817073	0.829268	0.695122	0.585366	0.646341
	100	2.90244	2.91463	2.86585	2.19512	2.15854	2.12195
	300	4.08537	4	4.03658	3.36585	3.28049	3.26829
	1000	6.19512	6.18293	6.12195	5.07317	4.9878	4.86585
	3000	8.32927	8.37805	8.32927	7.5	7.21951	7.09756
