# Supplementary material for: Structural basis for the phase separation of the chromosome passenger complex
Source: eLife journal article supplement (doi:10.7554/elife.92709), 2024-03-08
Supplement: fig2-figsupp3-data1 [file Figure 2 - figure supplement 3C Workbook.xlsx]

## Sheet: Sheet1
Fig 2-Sup 3C-Source Data
	Time (sec)	Free Protein			Droplet Protein
	10	0.841463	0.804878	0.780488	0.756098	0.52439	0.658537
	100	2.87805	2.85366	2.78049	2.21951	2.19512	2.10976
	300	4.09756	4.03658	4	3.32927	3.29268	3.19512
	1000	6.17073	6.26829	6.14634	5.09756	5	4.90244
	3000	8.36585	8.47561	8.45122	7.47561	7.35366	7.17073
