# Supplementary material for: Structural basis for the phase separation of the chromosome passenger complex
Source: eLife journal article supplement (doi:10.7554/elife.92709), 2024-03-08
Supplement: fig2-figsupp3-data1 [file Figure 2 - figure supplement 3D Workbook.xlsx]

## Sheet: Sheet1
Fig 2-Sup 3D-Source Data
	Time (sec)	Free Protein			Droplet Protein
	10	2.09756	2.21951	2.14634	2.03659	1.96341	1.96341
	100	4.54878	4.7439	4.4878	4.78049	4.81707	4.7439
	300	5.76829	5.7439	5.87805	6.62195	6.52439	6.40244
	1000	7.84146	7.87805	7.73171	8.69512	8.59756	8.39024
	3000	8.95122	9.14634	9.15854	9.79268	9.42683	9.06098
