# Supplementary material for: Structural basis for the phase separation of the chromosome passenger complex
Source: eLife journal article supplement (doi:10.7554/elife.92709), 2024-03-08
Supplement: fig2-figsupp3-data1 [file Figure 2 - figure supplement 3E Workbook.xlsx]

## Sheet: Sheet1
Fig 2-Sup 3E-Source Data
	Time (sec)	Free Protein			Droplet Protein
	10	1.35366	1.36585	1.39024	1.30488	1.29268	1.29268
	100	2.58537	2.57317	2.54878	2.47561	2.46341	2.41463
	300	3.30488	3.28049	3.23171	3.28049	3.23171	3.12195
	1000	3.4878	3.5	3.35366	3.53659	3.46341	3.36585
	3000	3.4878	3.53659	3.41463	3.59756	3.5	3.37805
