# Supplementary material for: Structural basis for the phase separation of the chromosome passenger complex
Source: eLife journal article supplement (doi:10.7554/elife.92709), 2024-03-08
Supplement: fig3-data1 [file Figure 3D Workbook.xlsx]

## Sheet: Sheet1
Fig 3D-Source Data
	(ISB)WT	IMut1SB	IMut2SB
	0.353	0.167	0.3
	0.354	0.323	0.186
	0.365	0.302	0.223
	0.305	0.31	0.19
	0.338	0.332	0.134
	0.396	0.319	0.283
