# Supplementary material for: Structural basis for the phase separation of the chromosome passenger complex
Source: eLife journal article supplement (doi:10.7554/elife.92709), 2024-03-08
Supplement: fig4-data1 [file Figure 4D Workbook.xlsx]

## Sheet: Sheet1
Fig 4D-Source Data
	(ISB)WT	IMut3SB	IMut4SB	IMut5SB
	0.353	0.221	0.273	0.119
	0.354	0.296	0.219	0.109
	0.365	0.215	0.257	0.115
	0.305		0.299	0.109
	0.338		0.242	0.108
	0.396		0.295	0.13
