# Supplementary material for: Structural basis for the phase separation of the chromosome passenger complex
Source: eLife journal article supplement (doi:10.7554/elife.92709), 2024-03-08
Supplement: fig4-data1 [file Figure 4G Workbook.xlsx]

## Sheet: Sheet1
Fig 4G-Source Data
	(ISB)WT	IMut6SB	IMut7SB
	0.353	0.128	0.313
	0.354	0.117	0.269
	0.365	0.114	0.297
	0.305
	0.338
	0.396
