# Supplementary material for: Structural basis for the phase separation of the chromosome passenger complex
Source: eLife journal article supplement (doi:10.7554/elife.92709), 2024-03-08
Supplement: fig5-data1 [file Figure 5D Workbook.xlsx]

## Sheet: Sheet1
Fig 5D-Source Data
	(ISB)WT	ISBMut	IMut6SBMut
	0.353	0.148	0.407
	0.354	0.133	0.37
	0.365	0.109	0.377
	0.305
	0.338
	0.396
