# Supplementary material for: Structural basis for the phase separation of the chromosome passenger complex
Source: eLife journal article supplement (doi:10.7554/elife.92709), 2024-03-08
Supplement: fig5-data1 [file Figure 5E Workbook.xlsx]

## Sheet: Sheet1
Fig 5E-Source Data
	(ISB)WT	IMut6SB	IMut7SB	ISBMut	IMut6SBMut
	4	22.6	13.9	24.64	6.04
	3.16	17.82	11.25	20.3	5.55
	3.14	20.89	10.63	19.6	5.03
	2.98	19.75	11.19	22.1	5.46
	2.78	19.77	10.3	22.95	5.81
